# Supplementary material for: The Tomato Yellow Leaf Curl Virus Resistance Genes Ty-1 and Ty-3 Are Allelic and Code for DFDGD-Class RNA–Dependent RNA Polymerases
Source: PLoS Genet. 2013 Mar 28;9(3):e1003399. doi: 10.1371/journal.pgen.1003399 (PMC3610679; doi:10.1371/journal.pgen.1003399)
Supplement: Figure S5 — Clustal W alignment of A. thaliana RDR1 to RDR6, Ty-1, Ty-3 and ty-1. Differences between Ty-1, Ty-3 and MM are indicated with black boxes beneath the alignment. (PDF) [file pgen.1003399.s005.pdf]

[illegible]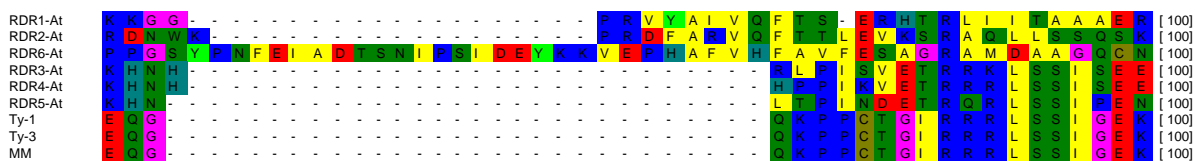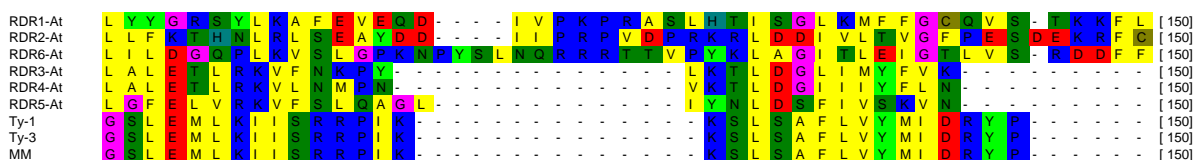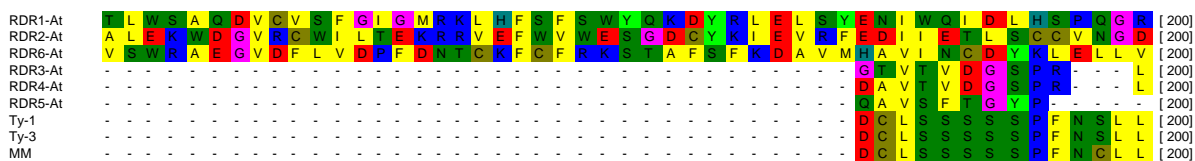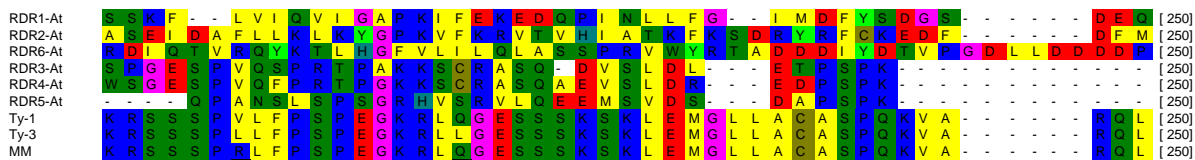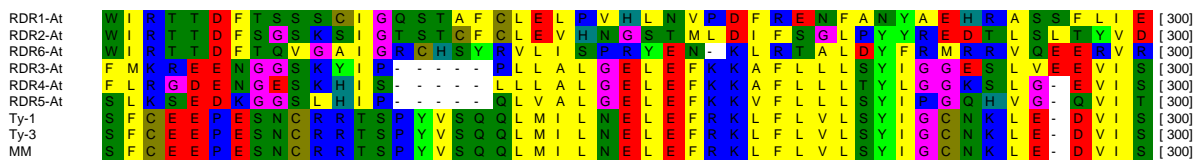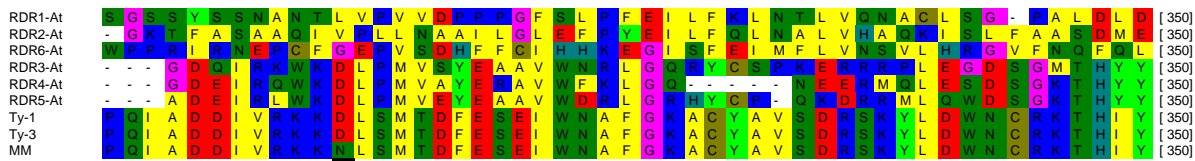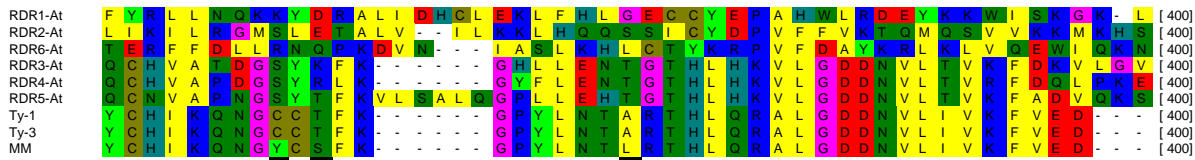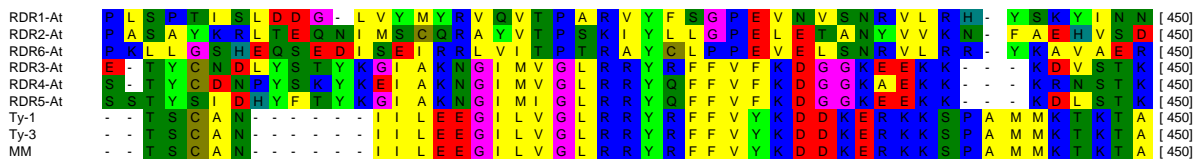

RDR1-At F L I V S F V D E D L E K V R S M D L S - - - - - R R S S - - - - - I Q R R T K L Y D R I Y S V L R [500]  
RDR2-At F M R V T F V D E D W S K L P A N A L S - - - - - V N S K E G F V K P S R T N I Y N R V L S I L T G [500]  
RDR6-At F L R V T F M D E S M Q T I N S N V L S Y F V A P I V K D L T S S S F S Q K T Y V F K R V L S I L T [500]  
RDR3-At G V A C Y F I R T D S T A S I D M Q N F - - - - - Y I F S A G K S M H E A R M H F M H V [500]  
RDR4-At G V A C Y F I R T D S T A S I D M Q N F - - - - - Y I L L S I S I H E A R M H F M H V [500]  
RDR5-At K V A C Y F I R T D S T A F Y D M Q N F - - - - - Y I L L T G K S I Y H E A R M H F M H V [500]  
Ty-1 S L K C Y F V R F E S I G T C N D D G E S - - - - - Y V F S T K T I S Q A R C K F M H V [500]  
Ty-3 S L K C Y F V R F E S I G T C N D D G E S - - - - - Y V F S T K T I S Q A R C K F M H V [500]  
MM S L K C Y F V R F E S I G T C N D D G E S - - - - - Y V F S T K T I S Q A R C K F M H V [500]

RDR1-At D G I V I V G D K K F E F F L A F S S S Q L R E N S S A V W M F A S P - I D R I V I A A H I R A W M G C F F D M I [550]  
RDR2-At D G I V I V G D K K F E F F L A F S S S Q L R E N S S A V W M F A S P - I D R I V I A A H I R A W M G C F F D M I [550]  
RDR6-At D G I V I V G D K K F E F F L A F S S S Q L R E N S S A V W M F A S P - I D R I V I A A H I R A W M G C F F D M I [550]  
RDR3-At N T L S S L P N Y M A R F S L I L L S K T K L E E V D M T E I T V M O I D D I H C H D D Q D D K D V L D D [550]  
RDR4-At H T L P S L A N Y M A R F S L I L L S K T K L E E V D M T E I T V M O I D D I H C H D D Q D D K D V L D D [550]  
RDR5-At H T L P S L A N Y M A R F S L I L L S K T K L E E V D M T E I T V M O I D D I H C H D D Q D D K D V L D D [550]  
Ty-1 H M V S N M A K Y A A R L S L I L L S K T K L E E V D M T E I T V M O I D D I H C H D D Q D D K D V L D D [550]  
Ty-3 H M V S N M A K Y A A R L S L I L L S K T K L E E V D M T E I T V M O I D D I H C H D D Q D D K D V L D D [550]  
MM H M V S N M A K Y A A R L S L I L L S K T K L E E V D M T E I T V M O I D D I H C H D D Q D D K D V L D D [550]

RDR1-At R N V A K Y A A R L G G G S F S S R E T L N V R S D E I V E - V I P D I E V I I S L G A T R Y V F S D G I [600]  
RDR2-At R S I S K C A A R M G L G C F S S T Y A I V D V M P H E V D T E V P D I E R N - - - G Y V F S D G I [600]  
RDR6-At - N V A K C A A R M G L G C F S S T Y A I V D V M P H E V D T E V P D I E R N - - - G Y V F S D G I [600]  
RDR3-At K N G K P C I H S D G T G Y I S E D L A M C C P L N I F X G K S M R S N N I Q S K N L F E G G P [600]  
RDR4-At K N G K P C I H S D G T G Y I S E D L A M C C P L N I F X G K S M R S N N I Q - - - - - E A [600]  
RDR5-At K N G K P C I H S D G T G Y I S E D L A M C C P L N I F X G K S M R S N N I Q - - - - - E A [600]  
Ty-1 E D G E P P R I H T D G T G F I S E D L A M H C P K D F S K A E Y I K D E N Y E N F V D I V D L D D V [600]  
Ty-3 E D G E P P R I H T D G T G F I S E D L A M H C P K D F S K A E Y I K D E N Y E N F V D I V D L D D V [600]  
MM E D G E P P R I H T D G T G F I S E D L A M H C P K D F S K A E Y I K D E N Y E N F V D I V D L D D V [600]

RDR1-At G K I S - - - - - A E F A R K V A R K C G L T E F S - P S A F G I R Y G G Y K G V V A V D R N S [650]  
RDR2-At G K I S - - - - - L A F A K Q V A R K C G L S H V - P S A F G I R Y G G Y K G V V A V D R N S [650]  
RDR6-At G K I S - - - - - O L A D E V M E K L C L D V H Y P C A Y G I R Y A G F K G V V A V D R N S [650]  
RDR3-At C G A - - - - - P P P L L I Q I F N I F Y N G Y A V K G G F L L N K K A L P P Q T V V Q V R P S M [650]  
RDR4-At C V G - - - - - P P P L L I Q I F N I F Y N G Y A V K G G F L L N K K A L P P Q T V V Q V R P S M [650]  
RDR5-At C V G - - - - - P P P L L I Q I F N I F Y N G Y A V K G G F L L N K K A L P P Q T V V Q V R P S M [650]  
Ty-1 N V E R R A S V S G N R E E P P P L L M Q Q G R L F F N G C A V K G G T F L L V N R K I G S R K I H I R P S M [650]  
Ty-3 N V E R R A S V S G N R E E P P P L L M Q Q G R L F F N G C A V K G G T F L L V N R K I G S R K I H I R P S M [650]  
MM N V E R R A S V S G N R E E P P P L L M Q Q G R L F F N G C A V K G G T F L L V N R K I G S R K I H I R P S M [650]

RDR1-At S K - - K L S L R K S M S K F E S E N T Y L N D V L A W S K Y Q P C Y M N R Q L I I T L L S T L G V T D [700]  
RDR2-At F R - - K L S L R D S M K K F D S N N R M L N E V T R W T E S M P C F L N R Q I I I C L L S V L G V E D [700]  
RDR6-At S D G I R K L A L R D S M K K F D S N N R M L N E V T R W T E S M P C F L N R Q I I I C L L S V L G V E D [700]  
RDR3-At I K - - V Y E D R T L L S N L S T F N S L E E V V T T S N P P R K A R L S R N L V A L L L S Y G G V V P N [700]  
RDR4-At I K - - V Y K D K N L S N F S T F N S L E E V V T T S N P P R K A R L S R N L V A L L L S Y G G V V P N [700]  
RDR5-At I K - - V S K D D P S L S N F S T F N S L E E V V T T S N P P R K A R L S R N L V A L L L S Y G G V V P N [700]  
Ty-1 V K - - V E I D P T I S S I P T F D S L E I V A I S H R P N K A Y L S K N L I S L L S Y G G V V H K [700]  
Ty-3 V K - - V E I D P T I S S I P T F D S L E I V A I S H R P N K A Y L S K N L I S L L S Y G G V V H K [700]  
MM V K - - V E I D P T I S S I P T F D S L E I V A I S H R P N K A Y L S K N L I S L L S Y G G V V H K [700]

RDR1-At S V F E E K K Q R E V V D R L D A I L T H P L E A H E A L G L M A P G E N T N I L K A L L C G Y A K P [750]  
RDR2-At A M F E A M Q A V H L S M L G N M L E D D R D V A A F E A L N V L L A S G A E Q G - L T A A I M L L S A G F A P [750]  
RDR6-At E I F L W D M Q E S M L L Y K L N R I L E D D R D V A A F E A L N V L L A S G A E Q G - L T A A I M L L S A G F A P [750]  
RDR3-At D F F L N I L R N I L F Y S E R A A A I N Y G - - D D D G Y T - A D M I M L L V G - I P [750]  
RDR4-At D F F L D I L L L T L E E K K T I F F Y V R A A A L G K A A A L N Y Y G E M D D D K N A - A L Q M I M A G - I P [750]  
RDR5-At E F F L D I L L L T L E E S K S I F F Y Y A A A L N Y Y G E M D D D D N A - A L Q M I M A G - I P [750]  
Ty-1 E E Y F L E L L L G S A L E E E T K Q V Y L A K R A A L K V A I N Y Y R E M D D D E C L T A R M I S S G - I P [750]  
Ty-3 E E Y F L E L L L G S A L E E E T K Q V Y L A K R A A L K V A I N Y Y R E M D D D E C L T A R M I S S G - I P [750]  
MM E E Y F L E L L L G S A L E E E T K Q V Y L A K R A A L K V A I N Y Y R E M D D D E C L T A R M I S S G - I P [750]

RDR1-At D A E P F L S M M L Q N F R A S K L L E L R T K T R I F L V S G G R I L M G G L D D E M G I L E Y G G V [800]  
RDR2-At S S E P F L S M M L R V H H E S Q L S E L K S T R C R I F L V S G G R I L M G G L D D E M G I L E Y G G V [800]  
RDR6-At K T E P H L R G M L S S Y V R I A D L W G R E K S R I F V T S G G R I L M G G L D D E M G I L E Y G G V [800]  
RDR3-At L D E P Y L K D R L S Y L L K T E R N A L K A - G R F P I D E S Y Y I M G T V D D P T G E L K E N E I [800]  
RDR4-At L D E P Y L K H Y L S K L L K L E K N D L K A - G K L P I D E S Y Y I M G T V D D P T G E L K E N E I [800]  
RDR5-At L D E P Y L K N Y L S I L L K L E K N D L K A - G K L P I D E S Y Y I M G T V D D P T G E L K E N E I [800]  
Ty-1 L N E P H L H V R L S R L A K I E R T K L R G - G K L P I D S S F Y L M G T A D P T G V L E S N E V [800]  
Ty-3 L N E P H L H V R L S R L A K I E R T K L R G - G K L P I D S S F Y L M G T A D P T G V L E S N E V [800]  
MM L N E P H L H A R L S R L A K I E R T K L R G - G K L P I D S S F Y L M G T A D P T G V L E S N E V [800]

RDR1-At V V G Y S D P M R P - G R R - - - - - F I Y I T G P V V V A L N P C L H P G D V R V L [850]  
RDR2-At Y V A V T L T K A E - L K S R D Q S Y F R K I D E E T S V V I G K V V V A L N P C L H P G D V R V L [850]  
RDR6-At F I L V S K P S I E N C F S K H G S R F K E T K T D L E V V K G Y V V A I A K N P G L L H F G D I H V L [850]  
RDR3-At C V I L H S G Q I - - - - - G D V L V Y Y R N P G L L H F G D I H V L [850]  
RDR4-At S G I L A K S - - - - - G D V L V Y Y R N P G L L H F G D I H V L [850]  
RDR5-At C V I L E S G Q I - - - - - G E V L V Y Y R N P G L L H F G D I H V L [850]  
Ty-1 C V I L D N G Q V S - - - - - G R V L V Y Y R N P G L L H F G D V H V M [850]  
Ty-3 C V I L D N G Q V S - - - - - G R V L V Y Y R N P G L L H F G D V H V M [850]  
MM C V I L D N G Q V S - - - - - G R V L V Y Y R N P G L L H F G D V H V M [850]

RDR1-At G A V N V A L N - - - H M V D C V V F P Q K G L R P H P N E C S G G S D L D G D I Y F V C W D E [900]  
RDR2-At D A I V E V H F E - - - G Y L D C I I F F P Q K G L R P H P N E C S G G S D L D G D I Y F V C W D E [900]  
RDR6-At E A V D V Q L H - - - H M V D C L I F F P Q K G L R P H P N E C S G G S D L D G D I Y F V C W D E [900]  
RDR3-At K A T Y V K A L E D Y V G N S K F A V F F P Q K G P R S L G D D E E I A G G D F D G D M Y F I S R N P K [900]  
RDR4-At K A T Y V K S L E Q Y V G N S K F A V F F P Q K G P R S L G D D E E I A G G D F D G D M Y F I S R N P K [900]  
RDR5-At K A T Y V K A L E D Y V G N S K F A V F F P Q K G P R S L G D D E E I A G G D F D G D M Y F I S R N P K [900]  
Ty-1 K A R Y V E E L A D V V G D A K Y G I F F S T K G P R S A A T E E I A N G D F D G D M Y W V S I N R K [900]  
Ty-3 K A R Y V E E L A D V V G D A K Y G I F F S T K G P R S A A T E E I A N G D F D G D M Y W V S I N R K [900]  
MM K A R Y V E E L A D V V G D A K Y G I F F S T K G P R S A A T E E I A N G D F D G D M Y W V S I N R K [900]

RDR1-At L V P P - - R T S E P M D Y T E - - - - - P T Q I L D H O V T I E E V E E V F A N Y - - - - [950]  
RDR2-At L I P S - - E M D P P M D Y A G - - - - - R P R L M D H O V T L E E I H K F F V D Y - - - - [950]  
RDR6-At - - - - L A N E G L G V I C N A H V V M A D D R - - - - E E K S L G R A V N H Q D I I D F F A R N - - - - [950]  
RDR3-At L L L E H Y K P S E P W V S S S K P S K I Y T G R K Q P S E L S P E E E L E E E E L F K M F L K A R F C K R [950]  
RDR4-At L L L E H Y K P S E P W V S S S K P S K I Y T G R K Q P S E L S P E E E L E E E E L F K M F L K A R F C K R [950]  
RDR5-At L L L E H Y K P S E P W V S S S K P S K I Y T G R K Q P S E L S P E E E L E E E E L F K M F L K A R F C K R [950]  
Ty-1 L V D D S Y T T S R P W I R M H S T P K A V S - - K K P S E E F S A D E L E E Y E L F R Q F L E A K S K G A [950]  
Ty-3 L V D D S Y T T S R P W I R M H S T P K A V S - - K K P S E E F S A D E L E E Y E L F R Q F L E A K S K G A [950]  
MM L V D D S Y T T S R P W I R M H S T P K A V S - - K K P S E E F S A D E L E E Y E L F R Q F L E A K S K G A [950]

RDR1-At - - - - I V N D S L G I I A N A H T A F A D K K - - E P L K A F S D P C I E L A K K F S T A V D F F K [1000]  
RDR2-At - - - - M I S D T L G V I C N A H L V M A D D R - - - - D P E Y G A M D E E C L L A N L A H S R A V D F F K [1000]  
RDR6-At - - - - L A N E G L G V I C N A H V V M A D D R - - - - S E Y G A M D E E C L L A N L A H S R A V D F F K [1000]  
RDR3-At D V I G M A A A D C W L L A I M D R F L T L G D D E N V A K E E K A E E M K K K M L L L I D I Y Y D A I D A P K [1000]  
RDR4-At S V I G M A A A D C W L L A I M D R F L T L G D D E N V A K E E K A E E M K K K M L L L I D I Y Y D A I D A P K [1000]  
RDR5-At N V I G M A A A D S W L L A I M D R F L T L G D D E N V A K E E K A E E M K K K M L L L I D I Y Y D A I D A P K [1000]  
Ty-1 N M S L A A A D S W L L A F M D R L L L M L R D D N V D M H S L K G K M L H L I D I Y Y D A I D A P K [1000]  
Ty-3 N M S L A A A D S W L L A F M D R L L L M L R D D N V D M H S L K G K M L H L I D I Y Y D A I D A P K [1000]  
MM N M S L A A A D S W L L A F M D R L L L M L R D D N V D M H S L K G K M L H L I D I Y Y D A I D A P K [1000]

RDR1-At T G V A A V I P G H L Y V K E Y P D F M E K P E D K P T Y I E S K N V I F G K L F R E V K E R A P P L I S [1050]  
RDR2-At T G A P A E M P Y A L K P R E F P D F M E K P E D K P T Y I E S K N V I F G K L F R E V K E R A P P L I S [1050]  
RDR6-At T G K I V S M P P F H L K P K L Y P D F M G K E D P Y Q T Y I S E S K N V I F G K L F R E V K E R A P P L I S [1050]  
RDR3-At K G A K V D L P P D L E I K N F P H Y M E R D P K R D F R S T S I L G L I F D T V D S - - - - H [1050]  
RDR4-At T G K E V V L P L D V K V D I F P H Y M E R N - - K T F K S T S I L G L I F D T V D S - - - - H [1050]  
RDR5-At K G D K V V L P N K L K P D I F P H Y M E R N - - K T F K S T S I L G L I F D T V D S - - - - H [1050]  
Ty-1 S G K K V S I P H Y L K A N K F P H Y M E K G N S C S Y H S T S I L G Q I Y D H V D S - - - - Y [1050]  
Ty-3 S G K K V S I P H Y L K A N K F P H Y M E K G N S C S Y H S T S I L G Q I Y D H V D S - - - - Y [1050]  
MM S G K K V S I P H Y L K A N K F P H Y M E K G N S C S Y H S T S I L G Q I Y D H V D S - - - - Y [1050]

RDR1-At I K S F - - L D V A S K S Y D V D M E V D G F E E S Y V D E A F Y Q K A N Y D F K L G N L M D Y Y G I [1100]  
RDR2-At K K P E - - A E S E D T V A Y D V L E E A G F E E S F I E A F A H R D M Y G E K L T S L L M I Y Y G A [1100]  
RDR6-At A S S E S E S T D G A I Y D A V L E I G F E E D L I F S A F A H R D M Y G E K L T S L L M I Y Y G A [1100]  
RDR3-At N A E E P P P S - E I S K L W Y F F E D E P V S E F H M D E K F T S W Y E N Y K S E M S Q A M M E T D C [1100]  
RDR4-At N A E E P P P S - E I S K L W Y F F E D E P V S E F H M D E K F T S W Y E N Y K S E M S Q A M M E T D C [1100]  
RDR5-At T T E E P P P S - E I S K L W Y F F E D E P V S E F H M D E K F T S W Y E N Y K S E M S Q A M M E T D C [1100]  
Ty-1 P D E D L C I T - E E I S K L P G F E V E - I P Q R C M T L W R G R Y E E Y K K D M T Q A M N L D C E [1100]  
Ty-3 P D E D L C I T - E E I S K L P G F E V E - I P Q R C M T L W R G R Y E E Y K K D M T Q A M N L D C E [1100]  
MM P D E D L C I T - E E I S K L P G F E V E - I P Q R C M T L W R G R Y E E Y K K D M T Q A M N L D C E [1100]

RDR1-At K T E A E I L S G G I M R M S K S F T K R R D - - - - - A E S I G R A V R A L K K E T L S L F N A [1150]  
RDR2-At A N E E E I L T G H I L K T K S M Y L A R D N R R Y G D M K D R I T L S V K D L H K E A M G W F E E K [1150]  
RDR6-At G K E E E I V T G H I W S M P K Y T S K K D G G E L K E R L K H S Y N S L K K E F R K V F E E [1150]  
RDR3-At V K R N Q L T N E V I Q R Y K Q D F Y G A A G - - - - - K A F T S W Y E N Y K S E M S Q A M M E T D C [1150]  
RDR4-At - - - D D S C N E E V I Q R Y K Q D F Y G A A G - - - - - K A F T S W Y E N Y K S E M S Q A M M E T D C [1150]  
RDR5-At - - - D D S C N E E V I Q R Y K Q D F Y G A A G - - - - - K A F T S W Y E N Y K S E M S Q A M M E T D C [1150]  
Ty-1 L R - I T S C N E E V I K K Y K M L L Y G A V E - - - - - K A F T S W Y E N Y K S E M S Q A M M E T D C [1150]  
Ty-3 L R - I T S C N E E V I K K Y K M L L Y G A V E - - - - - K A F T S W Y E N Y K S E M S Q A M M E T D C [1150]  
MM L R - I T S C N E E V I K K Y K M L L Y G A V E - - - - - K A F T S W Y E N Y K S E M S Q A M M E T D C [1150]

RDR1-At S - E E E E N E S - - - - - A K A S A W Y Y H V T Y H S S Y W G L - - - - - Y N E G L N R D H [1200]  
RDR2-At S C E D E Q Q K K - - - - - K L A S A W Y Y H V T Y N P N H R - - - - - D E K L T - - - - - [1200]  
RDR6-At T I F D H E N L S E E E K N I L Y E K K A L A S A W Y Y H V T Y H P E W V K K S L E L D D P D E S S H A Y A [1200]  
RDR3-At S N K S L E E L Y P - - - - - K A L A L Y N V V Y D Y A - I D E G V A K - - - - - [1200]  
RDR4-At S K K I L E E E L Y P - - - - - K A L A L Y N V V Y D Y A - I D E G V A K - - - - - [1200]  
RDR5-At S K K S L E E E L Y P - - - - - K A L A L Y N V V Y D Y A - I D E G V A K - - - - - [1200]  
Ty-1 T V A K T E E D I F D - - - - - E A L A I Y H V T Y D N A R I T Y S I E K - - - - - [1200]  
Ty-3 T V A K T E E D I F D - - - - - E A L A I Y H V T Y D N A R I T Y S I E K - - - - - [1200]  
MM T V A K T E E D I F D - - - - - E A L A I Y H V T Y D N A R I T Y S I E K - - - - - [1200]

RDR1-At F L S F A W C V Y D K L V R I K K T N - - L G R R Q R O E T L E R L D H V L R F G - [1242]  
RDR2-At F L S F A W I V V G D V L L R I K A E N - - A G R Q S V E E K T S G L V S I - - - - [1242]  
RDR6-At M L S F A W I A A D Y L A R I A I K S R E M G S I D S A P V D S L A K F L A Q R L - [1242]  
RDR3-At - C T F A W N V A G P V L C K F Y L - K K T K D K S V A S T S V L K K L L G - - - [1242]  
RDR4-At - C A F V W K V A G P V L C R F Y L N K K M O E K C L V C A P S V L K E L M G - - - [1242]  
RDR5-At - C G F A W K V A G S A L C R I H A M Y R K E - K D L P I L P S V L Q E I L - - - [1242]  
Ty-1 - C G F A W K V A G S A L C R I H A M Y R K E - K D L P I L P S V L Q E I L - - - [1242]  
Ty-3 - C G F A W K V A G S A L C R I H A M Y R K E - K D L P I L P S V L Q E I L - - - [1242]  
MM - C G F A W K V A G S A L C R I H A M Y R K E - K D L P I L P S V L Q E I L - - - [1242]
