# Supplementary material for: The Tomato Yellow Leaf Curl Virus Resistance Genes Ty-1 and Ty-3 Are Allelic and Code for DFDGD-Class RNA–Dependent RNA Polymerases
Source: PubMed Central journal article supplement (PMC3610679; doi:10.1371/journal.pgen.1003399), 2013-03-28

**Figure S2: Determining the exact point of recombination in R7.**

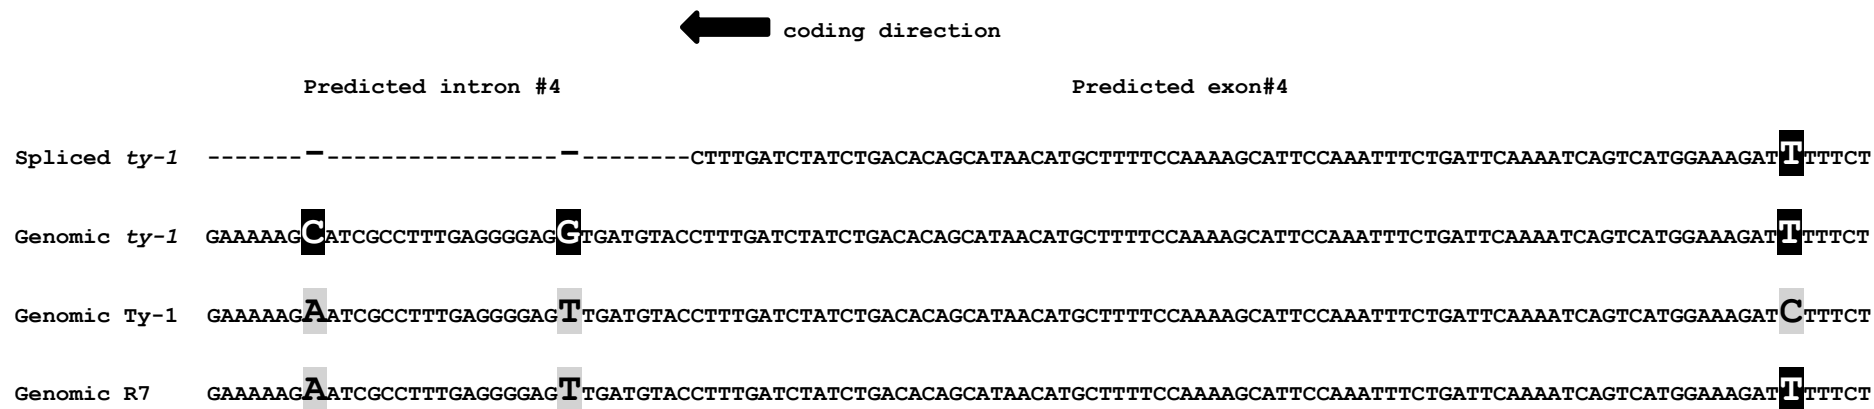

Supplement: pgen.1003399.s002.pdf [file pgen.1003399.s002.pdf]
