# Supplementary material for: The Tomato Yellow Leaf Curl Virus Resistance Genes Ty-1 and Ty-3 Are Allelic and Code for DFDGD-Class RNA–Dependent RNA Polymerases
Source: PubMed Central journal article supplement (PMC3610679; doi:10.1371/journal.pgen.1003399), 2013-03-28
Supplement: pgen.1003399.s003.pdf [file pgen.1003399.s003.pdf]

**Figure S3:** SNPs of markers M17, M25, M27, M29, M31 in R7, R8 and R11.

**M17**

*ty-1* TTCTCTCAATCGGACAATCC  
*Ty-1* TTCTCCTAATCAAACAATCC  
R7 TTCTCCTAATCAAACAATCC  
R8 TTCTCTCAATCGGACAATCC  
R11 TTCTCTCAATCGGACAATCC

**M25**

*ty-1* TACACAACATTGAAACTGTAAATCCGTAC  
*Ty-1* TACACGACATTGAAACTGTAAATCTGTAC  
R7 TACACGACATTGAAACTGTAAATCTGTAC  
R8 TACACAACATTGAAACTGTAAATCCGTAC  
R11 TACACAACATTGAAACTGTAAATCCGTAC

**M27**

*ty-1* TAATGTCAAAATTGATGGTCA  
*Ty-1* TAATGCCAAAATTGACGGTCA  
R7 TAATGCCAAAATTGACGGTCA  
R8 TAATGTCAAAATTGATGGTCA  
R11 TAATGTCAAAATTGATGGTCA

**M29**

*ty-1* TAGTTCAATGACCTCTTATGAT  
*Ty-1* TAGTTCACTGACCTCTTAAGAT  
R7 TAGTTCAATGACCTCTTATGAT  
R8 TAGTTCAATGACCTCTTATGAT  
R11 TAGTTCAATGACCTCTTATGAT

**M31**

*ty-1* GAGAAAGGTAACAGCAACATT  
*Ty-1* GAGAAAGGGAACAGTAACATT  
R7 GAGAAAGGTAACAGCAACATT  
R8 GAGAAAGGTAACAGCAACATT  
R11 GAGAAAGGGAACAGTAACATT
