# Supplementary material for: The Tomato Yellow Leaf Curl Virus Resistance Genes Ty-1 and Ty-3 Are Allelic and Code for DFDGD-Class RNA–Dependent RNA Polymerases
Source: PubMed Central journal article supplement (PMC3610679; doi:10.1371/journal.pgen.1003399), 2013-03-28

Figure S4: PCR strategy to prove that predicted genes Solyc06g051170, Solyc06g051180 and Solyc06g051190 together code for one gene

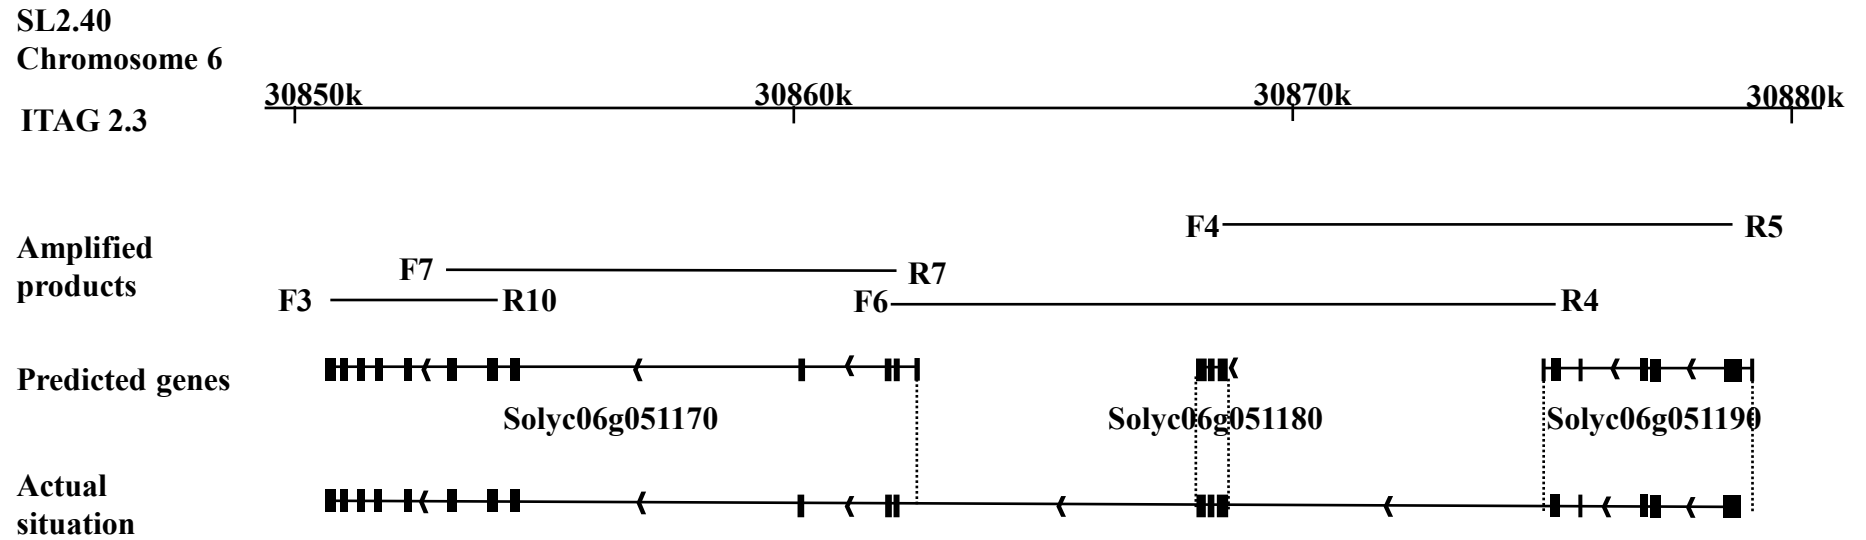

Supplement: pgen.1003399.s004.pdf [file pgen.1003399.s004.pdf]
