# Supplementary material for: The Tomato Yellow Leaf Curl Virus Resistance Genes Ty-1 and Ty-3 Are Allelic and Code for DFDGD-Class RNA–Dependent RNA Polymerases
Source: PubMed Central journal article supplement (PMC3610679; doi:10.1371/journal.pgen.1003399), 2013-03-28
Supplement: pgen.1003399.s006.pdf [file pgen.1003399.s006.pdf]

Figure S6. Clustal W alignment of *A. thaliana* RDR3, RDR4, RDR5, Ty-1, Ty-3 and ty-1

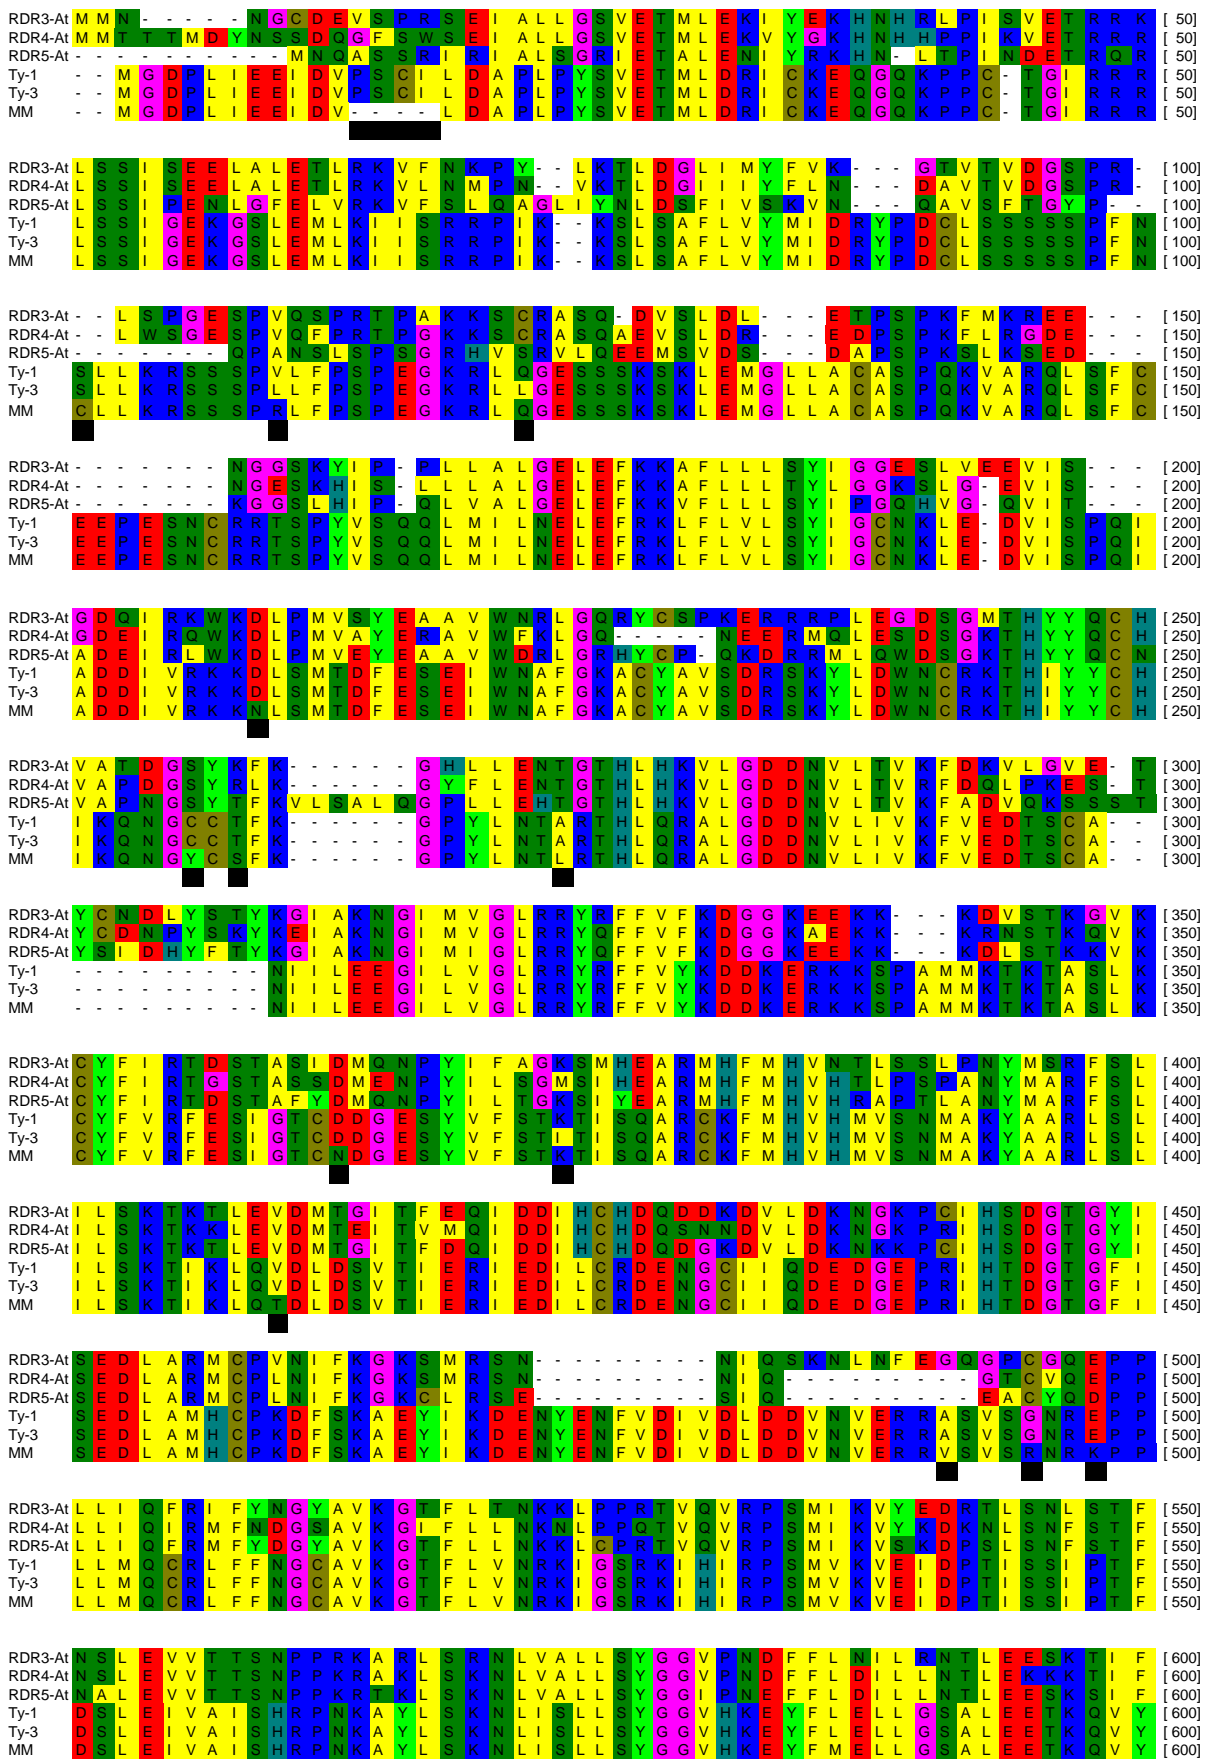

RDR3-At Y S E R A A F K A A I N Y G - - D D Q Y T - A D M I L V G I P L D E P Y L K D R L S Y L L L K T E R N [650]  
RDR4-At F K V R A A G K A A L H Y G N M D D D K N A - L Q M I M A G I P L D E P Y L K H Y L S K L L L K L E K D [650]  
RDR5-At Y N K R A A L N A A L N Y G E M D D D Q N A - A Q M I L V G I P L D E P H L K N Y L S I L L L K T E K N [650]  
Ty-1 L R K R A A L K V A I N Y R E E M D D D E C L T A R M I S S G I P L N E P H L H V R L S R L A K I E R T [650]  
Ty-3 L R K R A A L K V A I N Y R E E M D D D E C L T A R M I S S G I P L N E P H L H V R L S R L A K I E R T [650]  
MM L R K R A A L K V A I N Y R E E M D D D E C L T A R M I S S G I P L N E P H L H A R L S R L A K I E R T [650]

RDR3-At A L K A G R F P I D E S Y Y I M G T V D P T G E L K E N E I C V I L H S G G I S G D V L V Y R N P G [700]  
RDR4-At D L K A G K L P I D E S Y Y L M G T V D P T G E L K E D E V S G L A K S - - G D V L V Y R N P G [700]  
RDR5-At D L K A G K L P V T S S Y Y L M G T V D P T G A L K E D E V C V I L L E S G G I S G G E V L V Y R N P G [700]  
Ty-1 K L R G G K L P I S D S S F Y L M G T A D D P T G V L E S N E V C V I L L D N G G V S S G R V L V Y R N P G [700]  
Ty-3 K L R G G K L P I S D S S F Y L M G T A D D P T G V L E S N E V C V I L L D N G G V S S G R V L V Y R N P G [700]  
MM K L R G G K L P I S D S S F Y L M G T A D D P T G V L E S N E V C V I L L D N G G V S S G R V L V Y R N P G [700]

RDR3-At L H F G D I H V L K A T Y V V K A L E D Y V G N A K F A V F F P Q K G P R S L G D E I A G G D F D G D D [750]  
RDR4-At L H F G D I H I L K A T Y V V K A L E Q Y V G N S K F A V F F P Q K G P R S L G D E I A G G D F D G D D [750]  
RDR5-At L H F G D I H I L K A T Y V V K A L E E Y V G N S K F A V F F P Q K G P R S L G D E I A G G D F D G D D [750]  
Ty-1 L H F G D V H V M K A R Y V V E E L A D V V G D A K Y G I F F S T K G P R S A A T E I A N G G D F D G D D [750]  
Ty-3 L H F G D V H V M K A R Y V V E E L A D V V G D A K Y G I F F S T K G P R S A A T E I A N G G D F D G D D [750]  
MM L H F G D V H V M K A R Y V V E E L A D V V G D A K Y G I F F S T K G P R S A A T E I A N G G D F D G D D [750]

RDR3-At M Y F I S R N P K L L E H F K P S E P W V S S S P R S K I Y C G R K P S E L S E E Q L E E E L F F K M [800]  
RDR4-At M Y F I S R N P K L L E H Y K P S E P W V S S S P R S K I Y T G R Q P S Q L S P E E Q L E E E L F F R M [800]  
RDR5-At M Y F I S R N P K L L E N F K P S E P W V S S S L T P S K A N S - - K K P S Q L S P E E L E E L F F R Q [800]  
Ty-1 M Y W V S I N R K L V D S Y T T S R P W I R M H S T P K A V S - - K K P S E F S A D E L E Y E L F R Q [800]  
Ty-3 M Y W V S I N R K L V D S Y T T S R P W I R M H S T P K A V S - - K K P S E F S A D E L E Y E L F R Q [800]  
MM M Y W V S I N R K L V D S Y T T S R P W I R M H S T P N A V S - - K K P S E F S A D E L E Y E L F R Q [800]

RDR3-At F L K A R F C K R D V I G M A A D C W L G I M D P F L L L G D E S A K E K Y E R K K N I L K L I D I [850]  
RDR4-At F L K T G F S P S S V I G A A A D S W L L A I M D R F L T L G G D D N V K E E K A E M K K K M L K L T D I [850]  
RDR5-At F L T A G F H A S N V I G I A A A D S W L L A I M D R F L L L L G D D D R A E K E K A E M K K K K M L L E L I D I [850]  
Ty-1 F L E A K S - - K G A N M S L A A D S W L A F M D R L L L M L R D D D N V D D M H S L K G K M L H L I D I [850]  
Ty-3 F L E A K S - - K G A N M S L A A D S W L A F M D R L L L M L R D D D N V D D M H S L K G K M L H L I D I [850]  
MM F L E A K S - - K G A N M S L A A D S W L A F M D R L L L L R D D D N V D D M H S L L K G K M L H L I D I [850]

RDR3-At Y Y D A L D A P K K G A K V D L P P D L E I K N F P H Y M E R D P K R D F R S T S I L G L I F D T V [900]  
RDR4-At Y Y D A L D A P K K G A K V D L P P D L E I K N F P H Y M E R N - - K T F Q S T S I L G L I F D T V [900]  
RDR5-At Y Y D A L D A P K K G G D E V N L P N K L P D I F P H Y M E R D - - K K F Q S T S I L G L I F D F V [900]  
Ty-1 Y Y D A L D A P K S G K K V S I P H Y L L K A N K F F P H Y M E K G N S C S Y H S T S I L G G Q I Y D H V [900]  
Ty-3 Y Y D A L D A P K S G K K V S I P H Y L L K A N K F F P H Y M E K G N S C S Y H S T S I L G G Q I Y D H V [900]  
MM Y Y D A L D A P K S G K K V S I P H Y L L K A N K F F P H Y M E K G N S C S Y H S T S I L G G Q I Y D H V [900]

RDR3-At D S H N A E E P P P S - - E I S K L W Y F E D E P V P K S H M D K F T S W Y E N Y R S E M S Q A M M E [950]  
RDR4-At D F H N A E D T T P S S - - G I S K L Q C F E D E P V S E F H M D E K C K L W H K D Y R K E M S Q A M N S [950]  
RDR5-At K S Q T T E E P S P S S - - E I S K L P C C F E D E P V S E F H M D E K C K R L W Y D N Y R T E M T Q A M K T [950]  
Ty-1 D S Y P D E D L C I T - - E I S K L P C C F E V E - - I P Q R C M T L W R G R Y E E Y K K D M T Q A M N L [950]  
Ty-3 D S Y P D E D L C I T - - E I S K L P C C F E V E - - I P Q R C M T L W R G R Y E E Y K K D M T Q A M N L [950]  
MM D S Y P D E D L C I T - - E I S K L P C C F E V E - - I P Q R C M T L W R G R Y E E Y K K D M T Q A M N F [950]

RDR3-At T D K V K R N Q L T N E V I Q R Y K Q E F Y G A A G F E D S N K S L E E L Y P Q A L A L Y N V V Y D [1000]  
RDR4-At D D - - - - D D S C N E V I Q R Y K Q E F Y S A A G F E D S K K I L E E L Y P K A L A L Y N V - - [1000]  
RDR5-At D K - - - - D E S A N E V I Q R Y K Q E F Y G A A G F E D S K K S L E E L Y P Q A L A L Y K I V Y D [1000]  
Ty-1 D C E L R - I T S G N E V I K K Y K M L L Y G A V E F E E Q T V R K T E D I F D E A L A I Y H V T Y D [1000]  
Ty-3 D C E L R - I T P G N E V I K K Y K M L L Y G A V E F E E Q T V R K T E D I F D E A L A I Y H V T Y D [1000]  
MM D C E L R - I T S G N E V I K K Y K M L L Y G A V E F E E Q T V R K T E D I F D E A L A I Y H V T Y D [1000]

RDR3-At Y A - I Q E G V A K C T F A W N V A G P V L C K F Y L - K K T K D K S V V A B T S V L K K L L G [1048]  
RDR4-At - - - - - - - - - - - - - - - - - - - - - - - - - - - - - - - - - - - - - - - - - - - - - - - - - [1048]  
RDR5-At Y A - I H A G V S K C R F V W K V A G P V L C R F Y L N K R M Q E - K C L V G A P S V L K E E L W G [1048]  
Ty-1 N A R I T Y S I E K C G F A W K V A G S A L C R I H A M Y R K E - K D L P I L P S V L Q E I L \* [1048]  
Ty-3 N A R I T Y S I E K C G F A W K V A G S A L C R I H A M Y R K E - K D L P I L P S V L Q E I L \* [1048]  
MM N A R I T Y S I E K C G F A W K V A G S A L C R I H A M Y R K E - K D L P I L P S V L Q E I L \* [1048]
