# Supplementary material for: The Tomato Yellow Leaf Curl Virus Resistance Genes Ty-1 and Ty-3 Are Allelic and Code for DFDGD-Class RNA–Dependent RNA Polymerases
Source: PubMed Central journal article supplement (PMC3610679; doi:10.1371/journal.pgen.1003399), 2013-03-28
Supplement: pgen.1003399.s007.pdf [file pgen.1003399.s007.pdf]

**Supplemental table 1: Agroinoculation disease test on the three most informative *Ty-1* RILS**

| Line | Average DI <sup>1</sup> | N <sup>2</sup> | Markers <sup>3</sup> |           |       |       |            |            |                    |            |           |                    |
|------|-------------------------|----------------|----------------------|-----------|-------|-------|------------|------------|--------------------|------------|-----------|--------------------|
|      |                         |                | M-H304P16            | M-H309K01 | T1563 | T0774 | MSc05732-3 | MSc05732-4 | SL_2.40ch06_30.696 | HBa0161K22 | FOS169A13 | SL_2.40ch06_30.891 |
| R7   | 1.3 ± 0.5               | 7              | -                    | -         | -     | +     | +          | +          | +                  | +          | +         | -                  |
|      | 0                       | 7              | -                    | -         | -     | +     | +          | +          | +                  | +          | +         | /                  |
|      | 0                       | 3              | -                    | -         | -     | +     | +          | +          | +                  | +          | +         | +                  |
| R8   | 4                       | 6              | -                    | -         | -     | +     | +          | +          | +                  | +          | -         | -                  |
|      | 4                       | 10             | -                    | -         | -     | /     | /          | /          | /                  | /          | -         | -                  |
|      | 4                       | 6              | -                    | -         | -     | -     | -          | -          | -                  | -          | -         | -                  |
| R11  | 4                       | 3              | -                    | -         | -     | -     | -          | -          | -                  | -          | -         | +                  |
|      | 4                       | 6              | -                    | -         | -     | -     | -          | -          | -                  | -          | -         | /                  |
|      | 4                       | 1              | -                    | -         | -     | -     | -          | -          | -                  | -          | -         | -                  |
| R12  | 0                       | 4              | -                    | -         | -     | -     | -          | -          | +                  | +          | +         | +                  |
|      | 0                       | 5              | -                    | -         | -     | -     | -          | -          | /                  | /          | /         | /                  |
|      | 4                       | 2              | -                    | -         | -     | -     | -          | -          | -                  | -          | -         | -                  |

<sup>1</sup> Average Disease Index (DI)

<sup>2</sup> Numbers of plant tested

<sup>3</sup> + = homozygous *Solanum chilense* , / = heterozygous, - = homozygous *S. lycopersicum*
