# Supplementary material for: The Tomato Yellow Leaf Curl Virus Resistance Genes Ty-1 and Ty-3 Are Allelic and Code for DFDGD-Class RNA–Dependent RNA Polymerases
Source: PubMed Central journal article supplement (PMC3610679; doi:10.1371/journal.pgen.1003399), 2013-03-28
Supplement: pgen.1003399.s008.pdf [file pgen.1003399.s008.pdf]

**Supplemental table 2. Recombinant inbred lines (RILs) derived from the cross between tomato inbreds Fla. 7781 and Fla. 8680, their genotypes for the *Ty-3* region of chromosome 6, and their phenotypes across two growing seasons.**

| Recombinant    | Chromosome 6 Introgressed Segment <sup>z</sup> |      |       |       |       |       |       |             |       |       |       |       | Mean RIL Rating <sup>y</sup> |                    |
|----------------|------------------------------------------------|------|-------|-------|-------|-------|-------|-------------|-------|-------|-------|-------|------------------------------|--------------------|
|                | C2_At2g39590                                   | MI23 | TG436 | TG178 | T0892 | T1563 | T0774 | cLEG-31-P16 | P6-25 | T1079 | T1098 | T0834 | Fall 2007                    | Spring 2008        |
| 683            | +                                              | +    | -     | -     | -     | -     | -     | -           | -     | -     | -     | -     |                              | 3.4 <sup>ab</sup>  |
| 343            | +                                              | +    | +     | -     | -     | -     | -     | -           | -     | -     | -     | -     | 1.8 <sup>f-i</sup>           | 2.5 <sup>c-e</sup> |
| 463            | +                                              | +    | +     | -     | -     | -     | -     | -           | -     | -     | -     | -     |                              | 3.3 <sup>ab</sup>  |
| 11             | +                                              | +    | +     | +     | -     | -     | -     | -           | -     | -     | -     | -     | 3.0 <sup>b</sup>             | 3.7 <sup>ab</sup>  |
| 359            | +                                              | +    | +     | +     | -     | -     | -     | -           | -     | -     | -     | -     | 3.2 <sup>ab</sup>            | 3.9 <sup>ab</sup>  |
| 503            | +                                              | +    | +     | +     | -     | -     | -     | -           | -     | -     | -     | -     | 1.2 <sup>k-n</sup>           | 3.0 <sup>bc</sup>  |
| 506            | +                                              | +    | +     | +     | +     | +     | -     | -           | -     | -     | -     | -     | 2.4 <sup>cd</sup>            | 3.0 <sup>bc</sup>  |
| 724            | +                                              | +    | +     | +     | +     | +     | -     | -           | -     | -     | -     | -     | 2.3 <sup>de</sup>            | 2.7 <sup>c-e</sup> |
| 186            | +                                              | +    | +     | +     | +     | +     | +     | -           | -     | -     | -     | -     | 3.0 <sup>b</sup>             | 3.7 <sup>ab</sup>  |
| 403            | +                                              | +    | +     | +     | +     | +     | +     | -           | -     | -     | -     | -     | 2.0 <sup>d-g</sup>           | 2.1 <sup>e-h</sup> |
| 554            | +                                              | +    | +     | +     | +     | +     | +     | +           | +     | -     | -     | -     | 2.1 <sup>d-f</sup>           | 0.9 <sup>o-r</sup> |
| 78             | +                                              | +    | +     | +     | +     | +     | +     | +           | +     | +     | -     | -     | 1.3 <sup>j-m</sup>           | 1.0 <sup>m-r</sup> |
| 705            | +                                              | +    | +     | +     | +     | +     | +     | +           | +     | +     | -     | -     | 1.1 <sup>k-n</sup>           | 2.1 <sup>e-h</sup> |
| 432            | +                                              | +    | +     | +     | +     | +     | +     | +           | +     | +     | +     | -     | 0.8 <sup>n-p</sup>           | 1.6 <sup>h-n</sup> |
| 362            | -                                              | +    | +     | +     | +     | +     | +     | +           | +     | +     | +     | +     | 0.6 <sup>o-q</sup>           | 1.6 <sup>h-m</sup> |
| 116            | -                                              | +    | +     | +     | +     | +     | +     | +           | +     | +     | +     | +     | 0.6 <sup>o-r</sup>           | 0.9 <sup>o-r</sup> |
| 718            | -                                              | -    | -     | -     | +     | +     | +     | +           | +     | +     | +     | +     | 1.3 <sup>i-l</sup>           | 1.9 <sup>f-j</sup> |
| 688            | -                                              | -    | -     | -     | +     | +     | +     | +           | +     | +     | +     | +     | 1.1 <sup>l-m</sup>           | 0.9 <sup>o-r</sup> |
| 552            | -                                              | -    | -     | -     | +     | +     | +     | +           | +     | +     | +     | +     | 1.2 <sup>k-n</sup>           | 2.0 <sup>f-i</sup> |
| 71             | -                                              | -    | -     | -     | +     | +     | +     | +           | +     | +     | +     | +     |                              | 1.5 <sup>h-o</sup> |
| 719            | -                                              | -    | -     | -     | -     | +     | +     | +           | +     | +     | +     | +     | 1.0 <sup>l-o</sup>           | 1.1 <sup>l-r</sup> |
| 157            | -                                              | -    | -     | -     | -     | -     | +     | +           | +     | +     | +     | +     | 1.8 <sup>f-i</sup>           | 2.4 <sup>d-g</sup> |
| 553            | -                                              | -    | -     | -     | -     | -     | -     | +           | +     | +     | +     | +     | 0.9 <sup>m-o</sup>           | 1.5 <sup>h-o</sup> |
| 367            | -                                              | -    | -     | -     | -     | -     | -     | +           | +     | +     | +     | +     | 0.9 <sup>m-o</sup>           | 2.0 <sup>f-h</sup> |
| 18             | -                                              | -    | -     | -     | -     | -     | -     | +           | +     | +     | +     | +     | 1.0 <sup>l-o</sup>           | 1.6 <sup>h-m</sup> |
| 6 <sup>x</sup> | -                                              | -    | -     | -     | -     | -     | -     | -           | +     | +     | +     | +     |                              |                    |
| 616            | -                                              | -    | -     | -     | -     | -     | -     | -           | -     | +     | +     | +     | 3.1 <sup>b</sup>             | 3.7 <sup>a</sup>   |
| 517            | -                                              | -    | -     | -     | -     | -     | -     | -           | -     | +     | +     | +     | 2.8 <sup>bc</sup>            |                    |
| 390            | -                                              | -    | -     | -     | -     | -     | -     | -           | -     | -     | -     | +     | 3.5 <sup>a</sup>             | 2.9 <sup>b-d</sup> |
| 405            | -                                              | -    | -     | -     | -     | -     | -     | -           | -     | -     | -     | +     | 1.9 <sup>e-h</sup>           | 2.7 <sup>c-e</sup> |
| Horizon        | -                                              | -    | -     | -     | -     | -     | -     | -           | -     | -     | -     | -     | 2.8 <sup>bc</sup>            | 2.9 <sup>b-d</sup> |
| Fla. 8602      | +                                              | +    | +     | +     | +     | +     | +     | +           | +     | +     | +     | +     | 1.7 <sup>g-j</sup>           |                    |
| Tygress        | -                                              | /    | /     | /     | /     | /     | /     | /           | /     | -     | -     | -     |                              | 1.9 <sup>g-k</sup> |
| HA3074         | -                                              | /    | /     | /     | /     | /     | /     | /           | /     | -     | -     | -     | 0.4 <sup>p-s</sup>           |                    |
| Security 28    | -                                              | /    | /     | /     | /     | /     | /     | /           | /     | -     | -     | -     |                              | 1.5 <sup>h-o</sup> |

<sup>z</sup> + = homozygous *Solanum chilense*, / = heterozygous, - = homozygous *S. lycopersicum*

<sup>y</sup> Different superscript letters represent statistically significant differences at  $P < 0.05$  based on Duncan's multiple range test.

<sup>x</sup> RIL was not tested in Fall 2007 or Spring 2008; evaluation in Fall 2008 indicated susceptibility (data not shown).
