# Supplementary material for: The Tomato Yellow Leaf Curl Virus Resistance Genes Ty-1 and Ty-3 Are Allelic and Code for DFDGD-Class RNA–Dependent RNA Polymerases
Source: PubMed Central journal article supplement (PMC3610679; doi:10.1371/journal.pgen.1003399), 2013-03-28
Supplement: pgen.1003399.s010.pdf [file pgen.1003399.s010.pdf]

**Supplemental table 4. Average *Tomato yellow leaf curl virus* disease severity index (DSI) for tomato cuttings evaluated in Spring 2009.**

| Line                                 | Description          | DSI                |   |     |       |
|--------------------------------------|----------------------|--------------------|---|-----|-------|
| Fla. 7776                            | susceptible parent   | 4.0 <sup>A</sup>   | ± | 0.0 | (n=6) |
| (Fla. 7776 x RIL 554) F <sub>1</sub> | heterozygous control | 3.3 <sup>B</sup>   | ± | 0.1 | (n=5) |
| (Fla. 7776 x RIL 157) F <sub>1</sub> | heterozygous control | 3.3 <sup>B</sup>   | ± | 0.1 | (n=6) |
| RIL 554                              | resistant parent     | 1.3 <sup>D-E</sup> | ± | 0.2 | (n=6) |
| RIL 157                              | resistant parent     | 1.4 <sup>D</sup>   | ± | 0.2 | (n=5) |
| Fla. 8680                            | resistant donor      | 1.0 <sup>E</sup>   | ± | 0.0 | (n=6) |
| Tygress                              | commercial hybrid    | 1.1 <sup>D-E</sup> | ± | 0.1 | (n=6) |
| Security28                           | commercial hybrid    | 1.8 <sup>C</sup>   | ± | 0.1 | (n=6) |
| Fla. 8602                            | resistant control    | 1.0 <sup>E</sup>   | ± | 0.0 | (n=4) |
| Horizon                              | susceptible control  | 4.0 <sup>A</sup>   | ± | 0.0 | (n=4) |

Results are displayed as mean ± SE; n = number of cuttings evaluated for each line; DSI = disease severity index as described in the "Materials and Methods" where higher numbers indicate more disease; different superscript letters represent statistically significant differences at  $P < 0.05$  based on Duncan's multiple range test.
