# Supplementary material for: The Tomato Yellow Leaf Curl Virus Resistance Genes Ty-1 and Ty-3 Are Allelic and Code for DFDGD-Class RNA–Dependent RNA Polymerases
Source: PubMed Central journal article supplement (PMC3610679; doi:10.1371/journal.pgen.1003399), 2013-03-28
Supplement: pgen.1003399.s011.pdf [file pgen.1003399.s011.pdf]

**Supplemental table 5. Molecular markers on chromosome 6 of tomato.**

| Marker name                  | Marker type    | Primer sequence (5'-3')                                  | Annealing temperature | Restriction enzyme | Reference    | Location on Tomato WGS Chromosomes (SL2.40)                    | Letter used in figure 2 |
|------------------------------|----------------|----------------------------------------------------------|-----------------------|--------------------|--------------|----------------------------------------------------------------|-------------------------|
| M-H309K01                    | CAPS           | F AGCCCCGAGAAAGACTTGT<br>R TTTTAAAGGGGTGTGCCAAG          | 60°C                  | <i>Hpy</i> F3I     | Verlaan 2011 | SL2.40ch06:3571844..3571863<br>SL2.40ch06:3571219..3571238     |                         |
| T1563                        | CAPS           | F ACTTCACCTACAAATCCTCCAGA<br>R GCCCTTCCCAATCCAGCAGT      | 56°C                  | <i>Taq</i> I       | Ji 2007      | SL2.40ch06:29260641..29260664<br>SL2.40ch06:29259047..29259066 |                         |
| T0774                        | CAPS           | F CTCCTCAACTGGTAATTCTCAGG<br>R GCAAACCAAAATACATCGGTATCAC | 55°C                  | <i>Mnl</i> I       | Ji 2007      | SL2.40ch06:30027683..30027706<br>SL2.40ch06:30027028..30027052 |                         |
| MSc05732-3                   | CAPS           | F ATGCTTTTCGAGCACGAGCT<br>R AGCCTAAAGAGAACTAGGCAGGGGA    | 55°C                  | <i>Rsa</i> I       | Verlaan 2011 | SL2.40ch06:30523528..30523548<br>SL2.40ch06:30524212..30524236 |                         |
| MSc05732-4                   | CAPS           | F ACGAGATGGAGCGGTCTCAAGCT<br>R GACAGATCTCCCGGTAGGAGAGCA  | 55°C                  | <i>Dde</i>         | Verlaan 2011 | SL2.40ch06:30600857..30600880<br>SL2.40ch06:30601501..30601524 |                         |
| SL_2.40ch06_30.696 (Ty-3-M1) | CAPS           | F TCTGAATGCAGGGTAATCATGT<br>R TGATTTGAGGCTCATAGAACC      | 60°C                  | <i>Msp</i> I       | Hutton 2011  | SL2.40ch06:30696326..30696347<br>SL2.40ch06:30696915..30696936 |                         |
| HBa0161K22 (Ty-3-M3)         | CAPS           | F AGCTCTCCAGGAGCAGTTTG<br>R CCCTCAAATAGTTTCAAAATACG      | 58°C                  | <i>Mse</i> I       | Hutton 2011  | SL2.40ch06:30814757..30814777<br>SL2.40ch06:30815261..30815285 | A                       |
| UF_TY3-P1                    | CAPS           | F AAGGAGGATCTGGCTGCTTT<br>R GTTGTTTGAATCGCTTCT           | 55 °C                 | <i>Alu</i> I       | Present      | SL2.40ch06:30816304..30816323<br>SL2.40ch06:30816698..30816717 | B                       |
| UF_TY3-P3                    | CAPS           | F TCAATTTTCACTGTTCTGACT<br>R CAAGAGTGAGGTTGTTCTTGATG     | 55 °C                 | <i>Bst</i> N I     | Present      | SL2.40ch06:30821240..30821261<br>SL2.40ch06:30821517..30821539 | C                       |
| WU_M17                       | Sequence based | F CCCCTTAGGAACATTCGCTCTCA<br>R AGGTTAGGGAACAAGCCAAGGCA   | 55°C                  | n/a                | Present      | SL2.40ch06:30824901..30826100<br>SL2.40ch06:30826113..30826135 | D                       |
| FOS00169A13 (Ty-3-M4)        | CAPS           | F AGCTATCAGCTGCCAGAGACAT<br>R CACCATCTGATCCAGAGAGC       | 56°C                  | <i>Mse</i> I       | Hutton 2011  | SL2.40ch06:30852074..30852095<br>SL2.40ch06:30852469..30852492 | E                       |
| WUR_M25                      | Sequence based | F TGCCAGACTCAGCATTAGTTGGGG<br>R TGTCCTCATGCCACACTTCCA    | 55°C                  | n/a                | Present      | SL2.40ch06:30868214..30868238<br>SL2.40ch06:30869157..30869180 | F                       |
| UF_TY3-P18                   | CAPS           | F AAGGTGCGGAGTGAAATTCT<br>R TTGGTGAGCGGTTGATACAC         | 55 °C                 | <i>Hinf</i> I      | Present      | SL2.40ch06:30872101..30873200<br>SL2.40ch06:30873067..30873086 | G                       |
| WU_M27                       | Sequence based | F TGTATCTCCAGGCTCTCTGT<br>R ACCTGTGGTAAGGTAGTGCAGGA      | 55°C                  | n/a                | Present      | SL2.40ch06:30875560..30875582<br>SL2.40ch06:30876226..30876248 | H                       |
| UF_TY3-P19                   | SCAR           | F CGTCTGCTTAATGTGGCAAT<br>R CAACGGAGGAGCATATCAT          | 55 °C                 | n/a                | Present      | SL2.40ch06:30876061..30876081<br>SL2.40ch06:30876451..30876470 | I                       |
| WU_M29                       | Sequence based | F TCTCACTATGAGCCACTGCTCGT<br>R TCCTGAATCGGCTCTGATTTGGA   | 55°C                  | n/a                | Present      | SL2.40ch06:30880703..30880726<br>SL2.40ch06:30881414..30881437 | J                       |
| WU_M31                       | Sequence based | F GCCTGGACGAATGGAGGAC<br>R ATGGGCATCGTCACTCGCG           | 55°C                  | n/a                | Present      | SL2.40ch06:30885455..30885475<br>SL2.40ch06:30886383..30886402 | K                       |
| UF_TY3-P23                   | CAPS           | F CAGAAAGGCGGATGAATAA<br>R GCGCAATGGAGGTAATAAAG          | 55 °C                 | <i>Alu</i> I       | Present      | SL2.40ch06:30886934..30886953<br>SL2.40ch06:30887313..30887332 | L                       |
| UF_TY3-P24                   | CAPS           | F TGGTCTCCCTTAACCATTTG<br>R TGGAACCGTGAAGGAAGAAC         | 55 °C                 | <i>Dpn</i> II      | Present      | SL2.40ch06:30890519..30890538<br>SL2.40ch06:30890878..30890897 | M                       |
| SL_2.40ch06_30.891 (Ty-3-M5) | CAPS           | F CCGAAGGTGATAACACGAC<br>R GGGACCCTAACCAATAAAC           | 56°C                  | <i>Bst</i> N I     | Hutton 2011  | SL2.40ch06:30891965..30891984<br>SL2.40ch06:30891379..30891400 |                         |
| SL_2.40ch06_31.040           | CAPS           | F TTCTCCAAAGTCATCCACCTAC<br>R GAGTCGTTTATTCGTGCAGATG     | 56°C                  | <i>Hpy</i> CH4 IV  | Hutton 2011  | SL2.40ch06:3104393..31040415<br>SL2.40ch06:31039807..31039825  |                         |
