# Supplementary material for: The Tomato Yellow Leaf Curl Virus Resistance Genes Ty-1 and Ty-3 Are Allelic and Code for DFDGD-Class RNA–Dependent RNA Polymerases
Source: PubMed Central journal article supplement (PMC3610679; doi:10.1371/journal.pgen.1003399), 2013-03-28
Supplement: pgen.1003399.s012.pdf [file pgen.1003399.s012.pdf]

## Supplemental table 6. Primers used in this study

### Primers used to make the TRV2 VIGS constructs

|          |   | Sequence 5'-3'                |
|----------|---|-------------------------------|
| TRV2-160 | F | CACCATGGGAGCGATAACATTGAG      |
|          | R | CCCACTTCCACCACAACCTCT         |
| TRV2-180 | F | CACCATGAAGACAAAACTGCTTCTTTG   |
|          | R | ACCATTTTCATCCCGACAAA          |
| TRV2-190 | F | CACCGCTTGAGATGGGCTTATTGG      |
|          | R | TCTCCCAGGGCTCTCTGTAA          |
| TRV2-PDS | F | CGGTCTAGAGGCACTCAACTTTATAAACC |
|          | R | CGGGGATCCCTTCAGTTTCTGTCAAACC  |

### Primers used to amplify products that show Solyc06g051170, Solyc06g051180 and Solyc06g051190 together code for one gene (See supplemental figure 4)

|     | Sequence 5'-3'            |
|-----|---------------------------|
| F3  | GCGTGGATCCTGCAAAGCGCA     |
| R10 | GGGAACAGCTGACCCCACTGGT    |
| F7  | CAGTAGCAGCTGACCTCGGGC     |
| R7  | TCGTGGACCTTGATGACGTGAATG  |
| F6  | CGGCACTGCATCAACAAAGGCG    |
| R4  | ACAGAGAGCCCTGGGAGATGACA   |
| F4  | CCATCATTGCAGGTTCCAATGGACT |
| R5  | AGCAGGGGCAAAAACCACCG      |

### Primers used for GeneRacer

|              | Sequence 5'-3'            |
|--------------|---------------------------|
| F5           | CTGAGGGCTTGACAGGCCAAT     |
| GeneRacer 5' | CGACTGGAGCACGAGGACTGA     |
| R3           | GCAGCTGATAGCTGGCTGGC      |
| GeneRacer 3' | GCTGTCAACGATACGCTACGTAACG |

### Primers used to amplify and TOPO clone the full length *Ty-1* and *Ty-3*. Start and stop codon are in bold

|            | Sequence 5'-3'                               |
|------------|----------------------------------------------|
| Ty-F7-CACC | CACCTTCAAGTATATACAGGAAAA <b>ATGGGTGATCCG</b> |
| Ty-R5      | <b>CTAGAGTATTTCTGCAAAACCGATG</b>             |
